CORRECTION

# Correction: Effects of taurine on resting-state fMRI activity in spontaneously hypertensive rats

Vincent Chin-Hung Chen, Tsai-Ching Hsu, Li-Jeng Chen, Hong-Chun Chou, Jun-Cheng Weng, Bor-Show Tzang

In the fourth sentence in the “Animals and diets” section within the Materials and methods, the IACUC approval number is listed incorrectly. The correct sentence is: All protocols were followed under the supervision of the Institutional Animal Care and Use Committee at Chung Shan Medical University (IACUC approval number: 1583), following the Guide for the Care and Use of Laboratory Animals that was published by the United States National Institutes of Health.

## Reference

1. Chen VC-H, Hsu T-C, Chen L-J, Chou H-C, Weng J-C, Tzang B-S (2017) Effects of taurine on resting-state fMRI activity in spontaneously hypertensive rats. PLoS ONE 12(7): e0181122. <https://doi.org/10.1371/journal.pone.0181122> PMID: 28700674

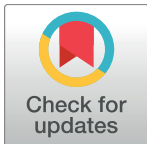

## OPEN ACCESS

**Citation:** Chen VC-H, Hsu T-C, Chen L-J, Chou H-C, Weng J-C, Tzang B-S (2017) Correction: Effects of taurine on resting-state fMRI activity in spontaneously hypertensive rats. PLoS ONE 12(12): e0190203. <https://doi.org/10.1371/journal.pone.0190203>

**Published:** December 19, 2017

**Copyright:** © 2017 Chen et al. This is an open access article distributed under the terms of the [Creative Commons Attribution License](https://creativecommons.org/licenses/by/4.0/), which permits unrestricted use, distribution, and reproduction in any medium, provided the original author and source are credited.
